# Supplementary material
Source: publisher figshare collection journal article supplement (https://karger.figshare.com/articles/dataset/_/4747810)
Supplement: Supplementary file 1 [file 1]

Shown here are NPL (S-pairs) [1] results computed in Merlin [2] comparing the three maps (MSAT, SNP, MSAT+SNP) for Baseline and Baseline+ data. (See main text for details.)

**Fig S2 1** NPL results comparing three maps for Baseline data set

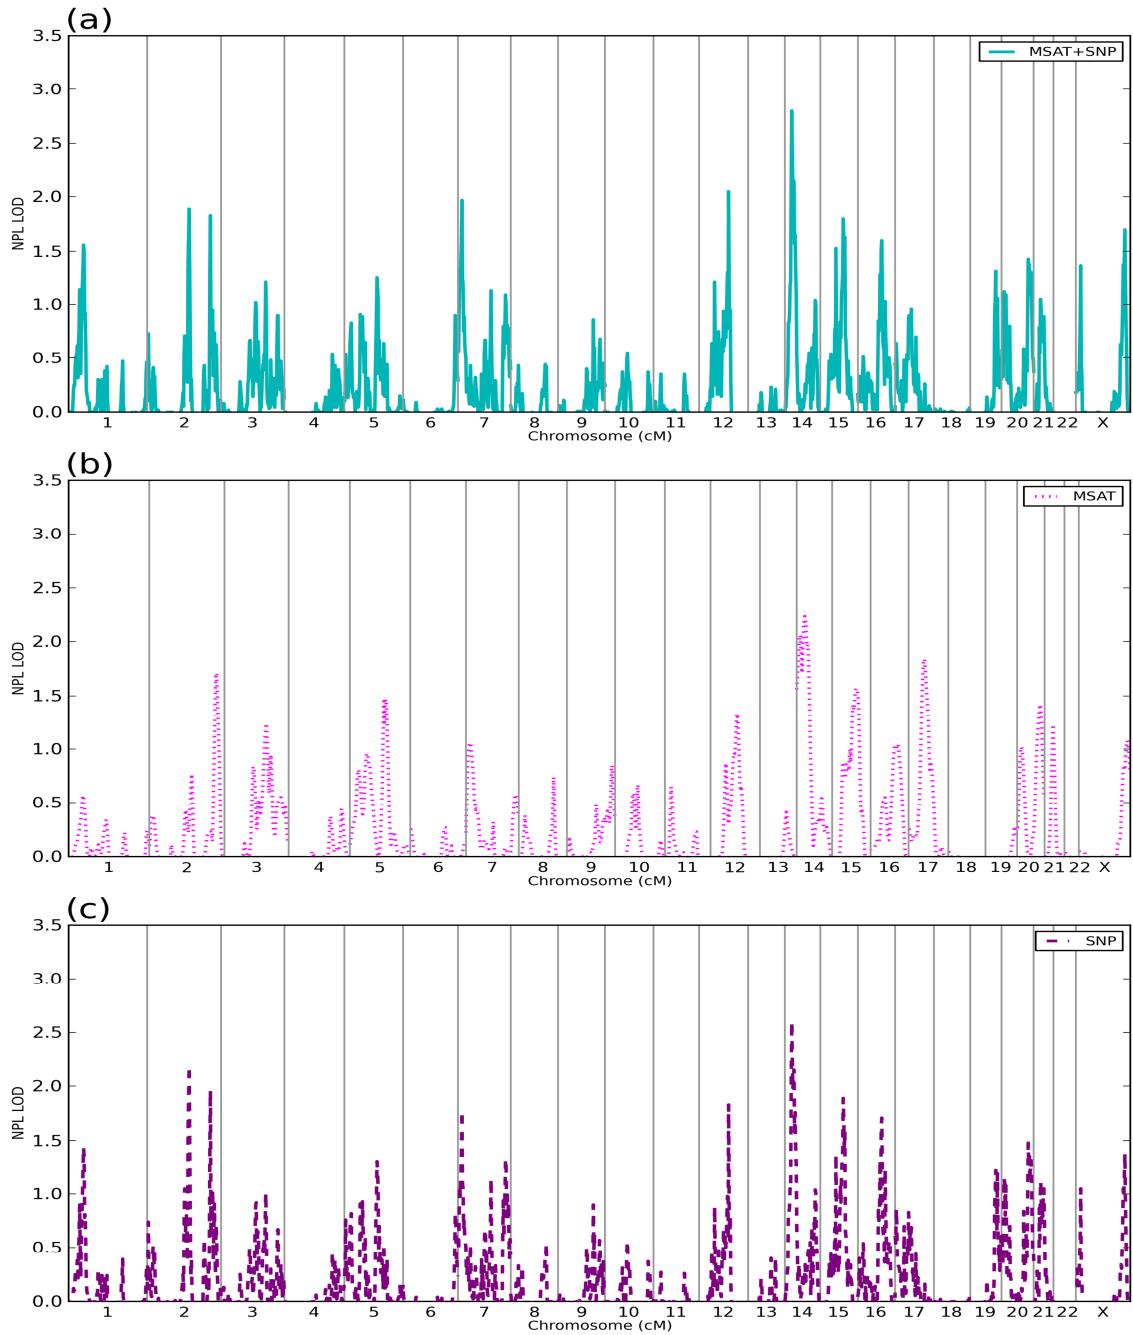

**Fig S2 2** NPL results comparing three maps for Baseline<sup>+</sup> data set

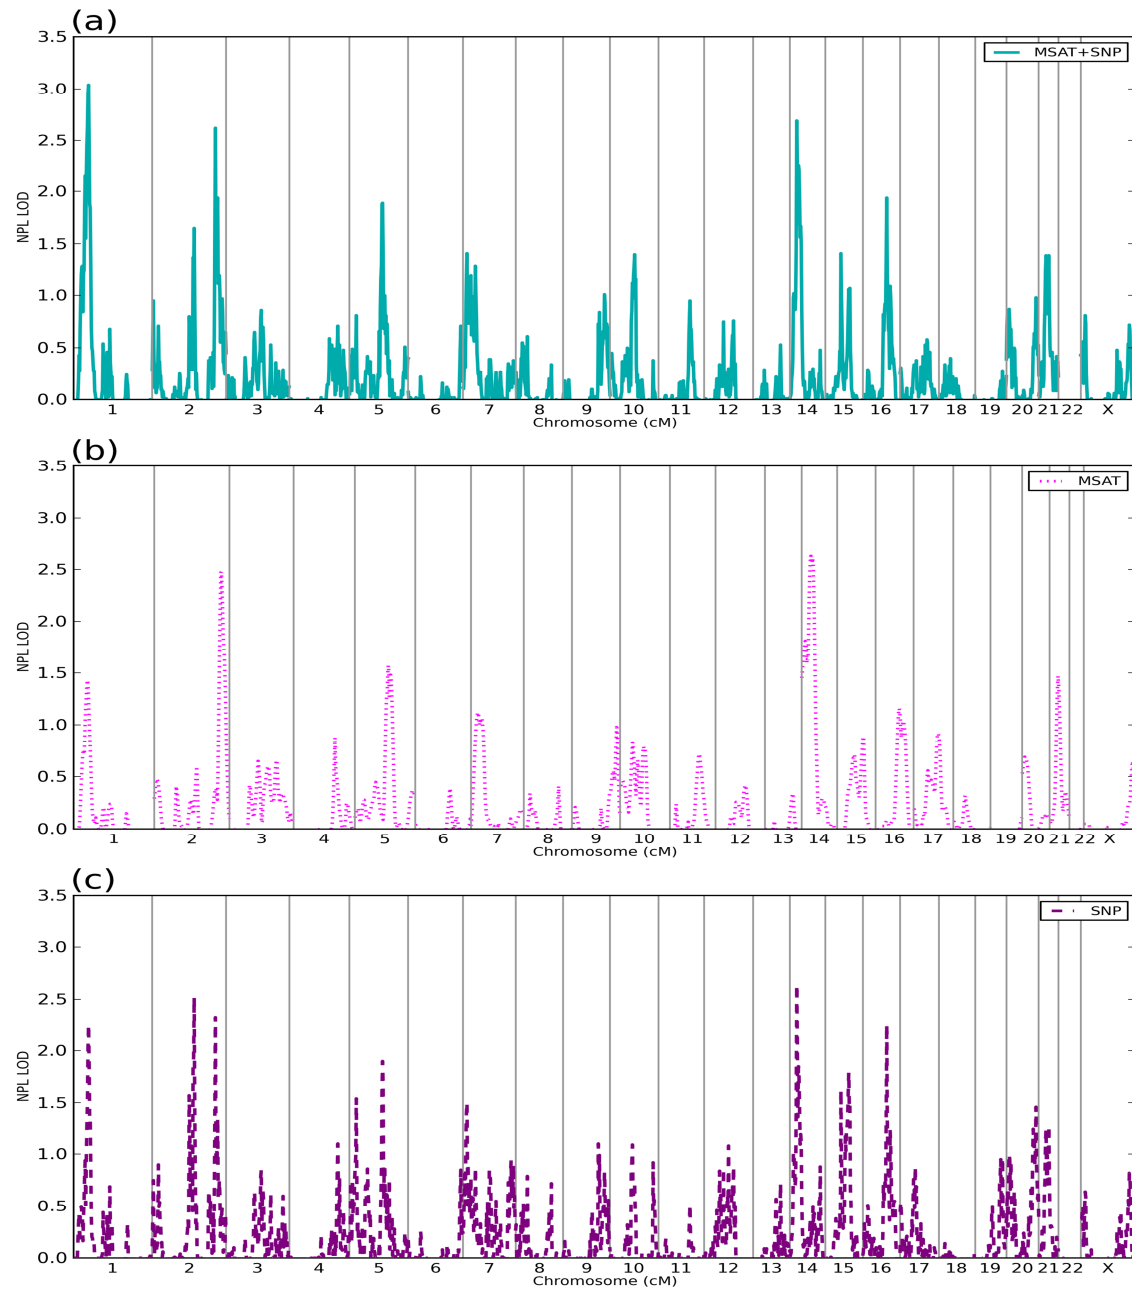

1. Kong, A. and N.J. Cox, *Allele-sharing models: LOD scores and accurate linkage tests*. Am J Hum Genet, 1997. **61**(5): p. 1179-88.
2. Abecasis, G.R., et al., *Merlin--rapid analysis of dense genetic maps using sparse gene flow trees*. Nat Genet, 2002. **30**(1): p. 97-101.
